# Supplementary material for: The potential of neurofilaments analysis using dry-blood and plasma spots
Source: PubMed Central journal article supplement (PMC6952412; doi:10.1038/s41598-019-54310-y), 2020-01-09
Supplement: 41598_2019_54310_MOESM1_ESM.pdf [file 41598_2019_54310_MOESM1_ESM.pdf]

# **The potential of neurofilaments analysis using dry-blood and plasma spots**

**Vittoria Lombardi, Daniele Carassiti, Gavin Giovannoni, Ching-Hua Lu, Rocco  
Adiutori, Andrea Malaspina**

**SUPPLEMENTARY DATA**

**Figure 1**

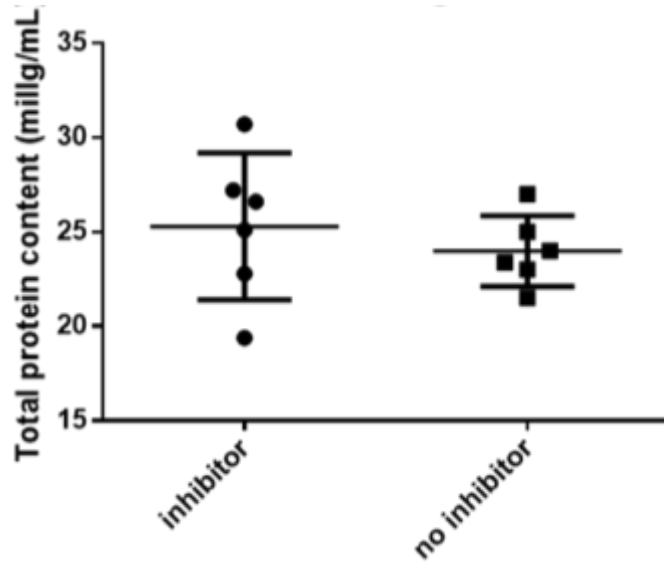

Figure 1 Total protein content in DBS elute of 6 controls with and without proteases inhibitor after 24 hours from the elution. Non-significant differences with t-test (Mann-Whitney test).

**Figure 2**

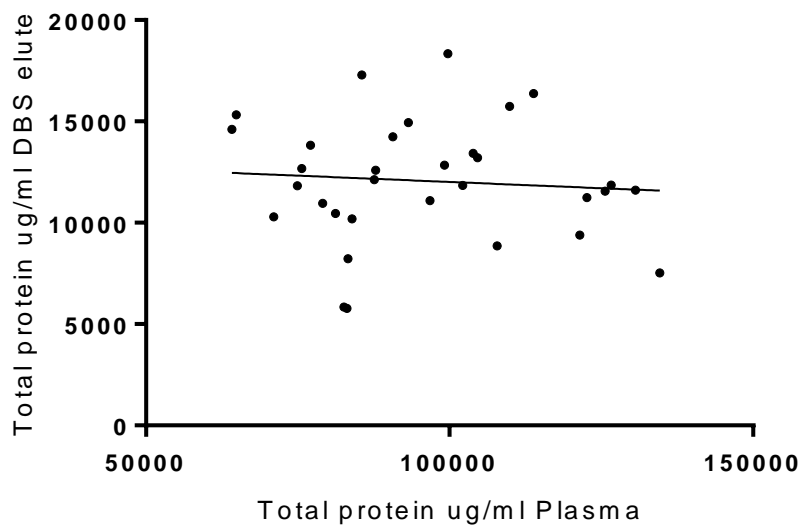

Figure 2 Total protein correlation between Plasma and DBS elute. Non-significant correlation, Pearson analysis,  $p=0.6$ .

**Figure 3**

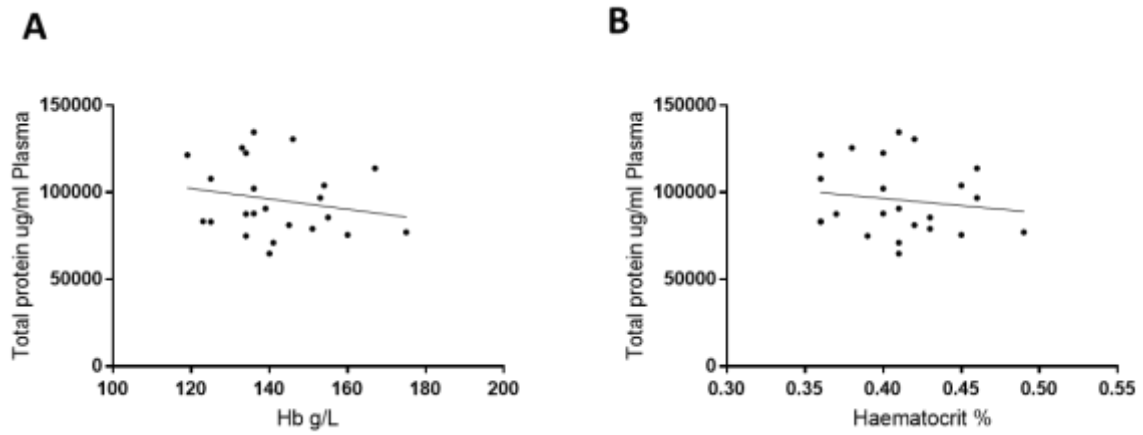

Figure 3 Correlation between Hb/Haematocrit and Total protein in plasma. Non-significant correlation, Pearson analysis. A:  $p=0.26$ ; B:  $p=0.4$

**Figure 4**

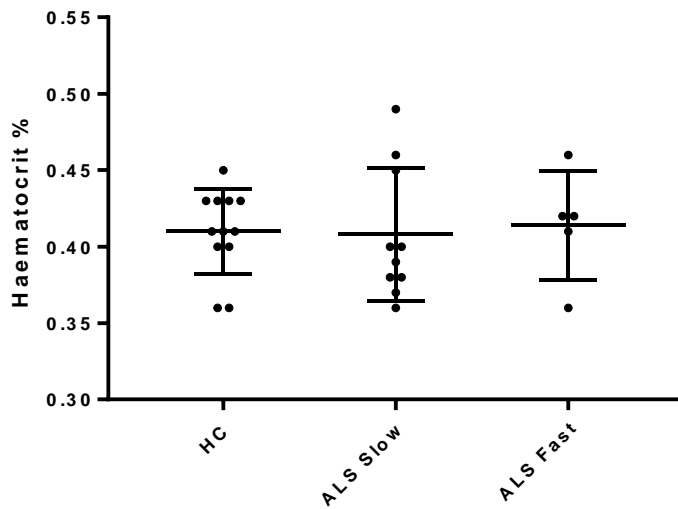

Figure 4 Haematocrit % in HC, slow and fast ALS patients. Non-significant differences with one-way ANOVA test,  $p > 0.99$ .

## SOURCE GEL IMAGES

Figure 4 A

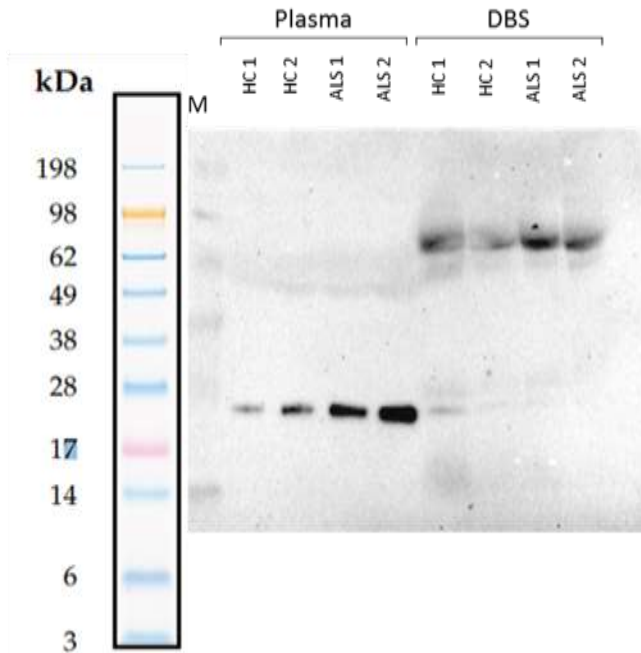

Figure 4 B

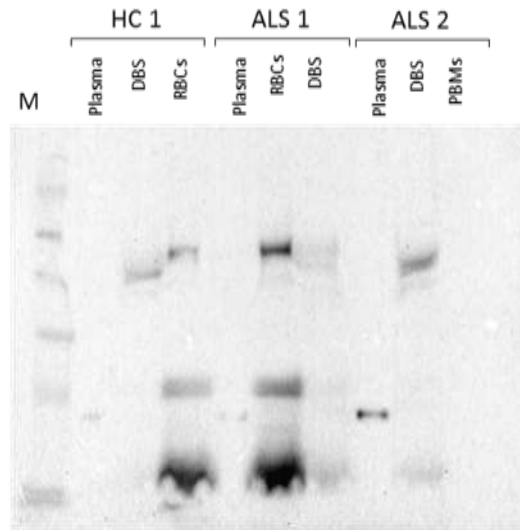

**Legend:** western blot analysis of neurofilament light (NF-L) comparing plasma and elute from DBS obtained from the same blood samples of healthy controls (plasma HC 1, 2; DBS HC 1, 2) and ALS individuals (plasma ALS 1, 2; DBS ALS 1, 2 - Figure 4 A). NF-L expression is also shown in plasma, DBS elutes, red blood cells (RBCs) and polymorphonuclear cells (PBMCs) obtained from blood samples of the same control and ALS individuals (HC1 and ALS 1 and 2 - Figure 4B). In the manuscript, only the gel lanes where ALS1 blood products were loaded are reported in Figure 4 B.

Marker (M): SeeBlue® Plus2 Cat. PLC5925

### **Figure 4 A**

ChemiDoc XRS+ imaging system

Software: Image Lab 5.2.1

Exposure: 122 sec

### **Figure 4 B**

ChemiDoc XRS+ imaging system

Software: Image Lab 5.2.1

Exposure: 412.4 sec
